# Supplementary material for: Cortical Entropy, Mutual Information and Scale-Free Dynamics in Waking Mice
Source: PubMed Central journal article supplement (PMC5028006; doi:10.1093/cercor/bhw200), 2016-09-19
Supplement: Supp_Figs.pdf [file Supp_Figs.pdf]

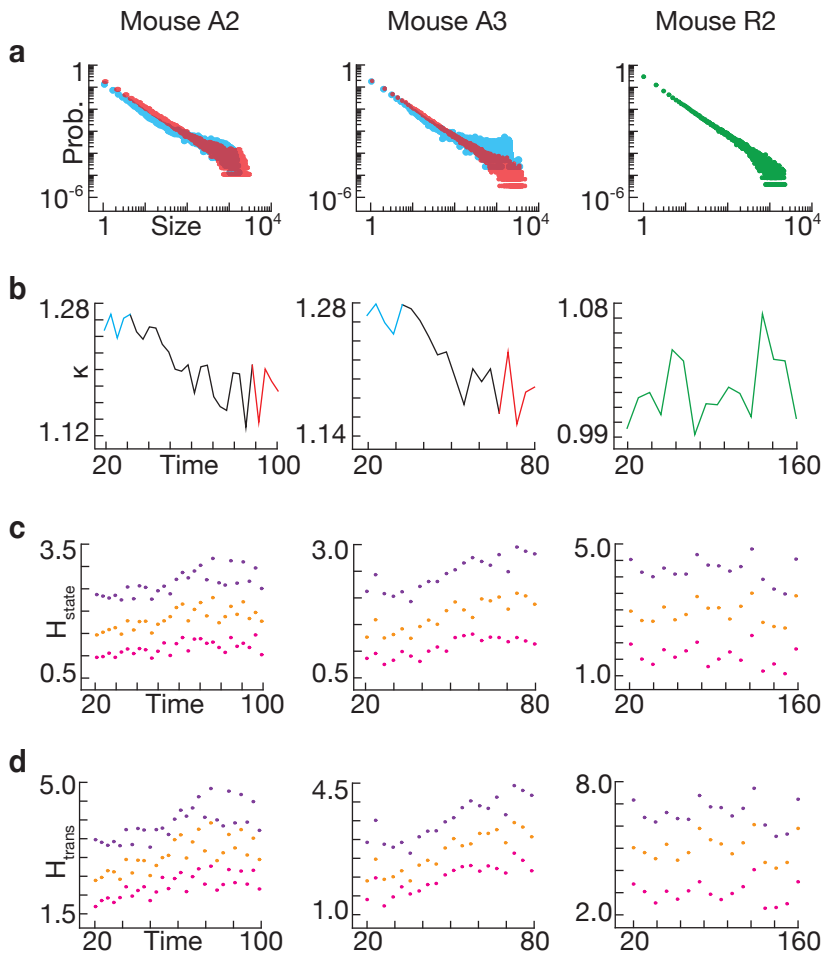

**Supplementary Figure 1:** **(a)** Size (pixels) probability distributions. Two mice recovering from anesthesia (A2 and A3) and one fully awake mouse (R2) shown from left to right in all panels. Colour coding as in Figure 2. **(b)**  $\kappa$  values as a function of time (minutes). Colour coding and mice as in **(a)**. **(c)** State entropy  $H_{\text{state}}$  (bits) as a function of time (minutes). Mice as in **(a)**. Pink, orange and purple colours correspond to 10, 50 and 200 clusters in the k-means algorithm. **(d)** Transition entropy  $H_{\text{trans}}$  (bits) from a 1<sup>st</sup> order Markov model as a function of time (minutes). Colour coding and mice as in **(c)**.

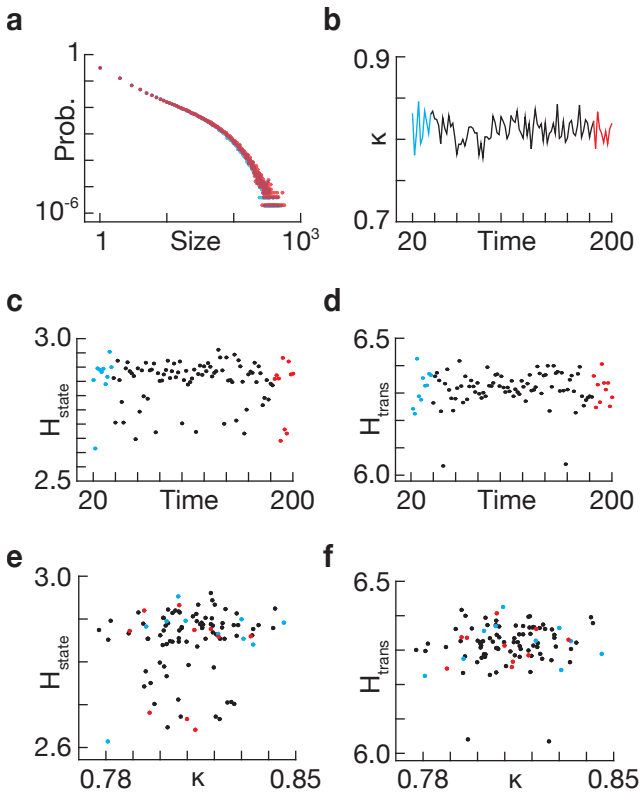

**Supplementary Figure 2:** Results for noise data corresponding to layout and colour coding in **Figure 2** for mouse A1.

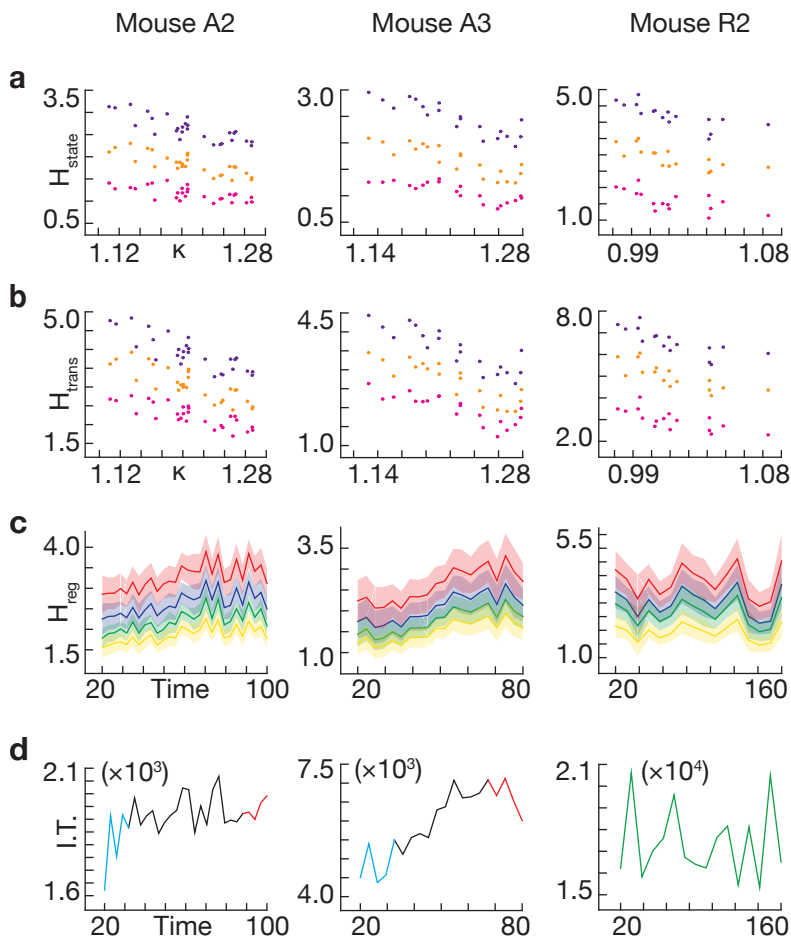

**Supplementary Figure 3:** (a) State entropy  $H_{\text{state}}$  (bits) as a function of  $\kappa$ . Colour coding and mice as in **Supp. Fig. 1 (c)**. (b) Transition entropy  $H_{\text{trans}}$  (bits) from a 1<sup>st</sup> order Markov model as a function of  $\kappa$ . Colour coding and mice as in **Supp. Fig. 1 (c)**. (c) Regional entropy  $H_{\text{reg}}$  (bits) as a function of time (minutes). Mice as in **Supp. Fig. 1**.  $H_{\text{reg}}$  is calculated for four different cortex grid definitions. Red: each square consists of 8x8 pixels for half temporal resolution data. Blue: each square consists of 8x8 pixels. Green: each square consists of 5x5 pixels for half spatial resolution data. Yellow: each square consists of 5x5 pixels. (d) Information transmission (bits), as a function of time (minutes). Colour coding and mice as in **Supp. Fig. 1 (a)**.

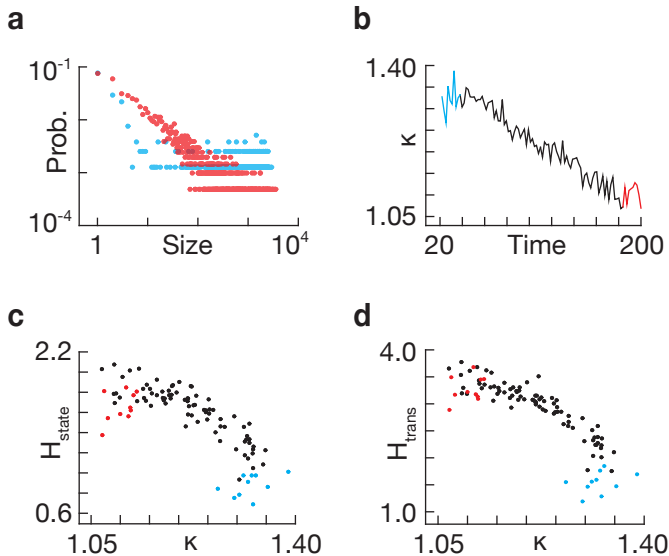

**Supplementary Figure 4:** Results for purely temporal cascade detection corresponding to layout and colour coding in **Figure 2 (a), (b), (e) & (f)** for mouse A1.

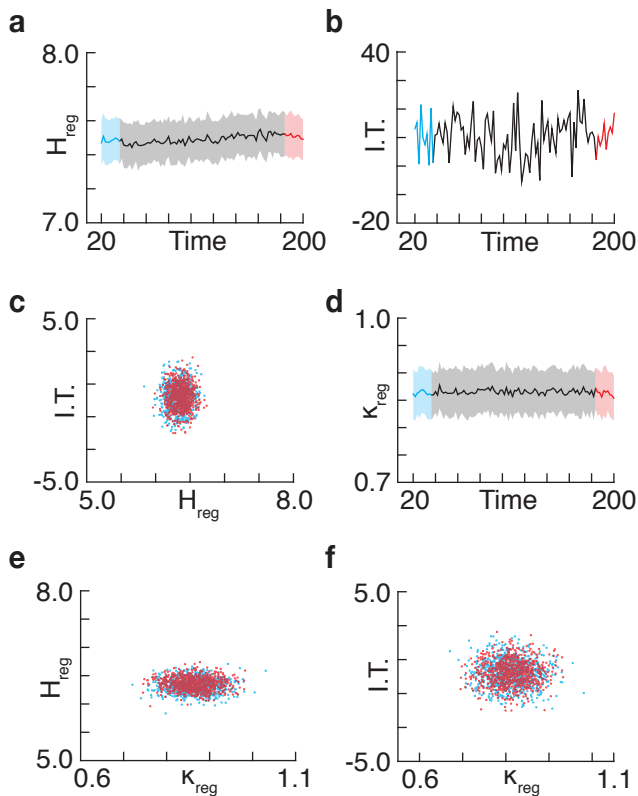

**Supplementary Figure 5:** Results for noise data corresponding to layout and colour coding in **Figure 4** for mouse A1.

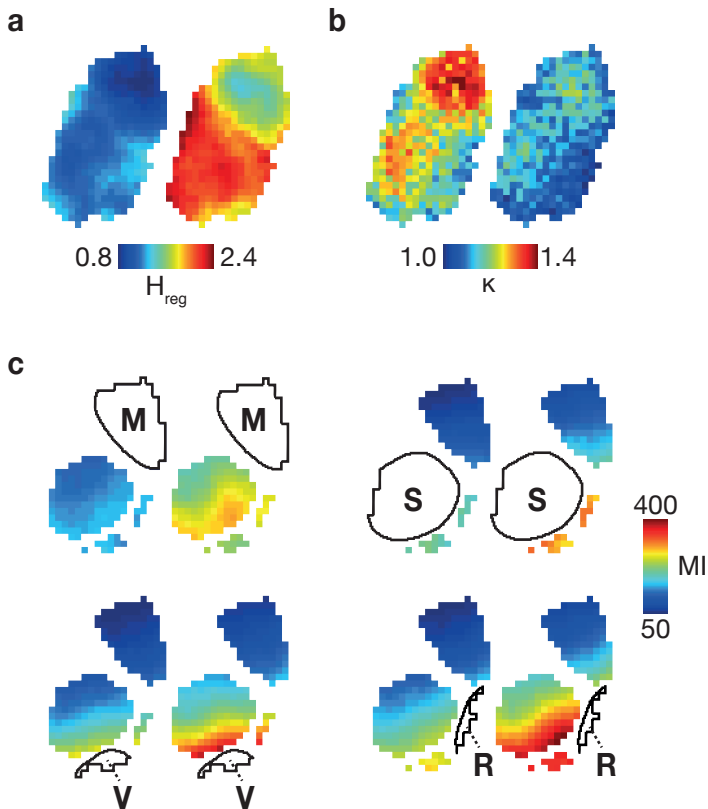

**Supplementary Figure 6: (a)**  $H_{\text{reg}}$  (bits) within  $5 \times 5$  pixel regions for anaesthetized (left) and awake (right) states. **(b)**  $\kappa_{\text{reg}}$  within  $5 \times 5$  pixel regions for anaesthetized (left) and awake (right) states. **(c)** Mean values of mutual information between all regions in the motor (top left), somatosensory (top right), visual (bottom left) and retrosplenial (bottom right) cortices and the rest of the brain for anaesthetized (left) and awake (right) states.

Mouse A2

Mouse A3

Mouse R2

**a**

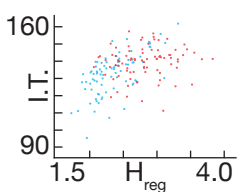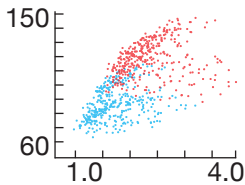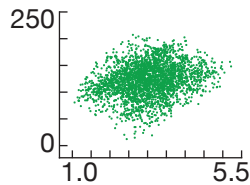

**b**

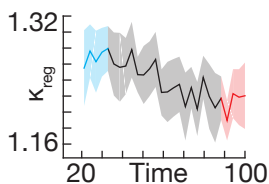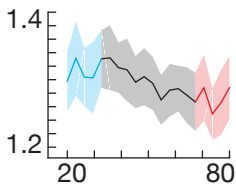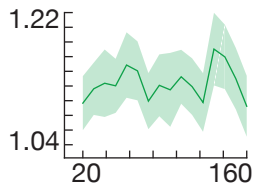

**c**

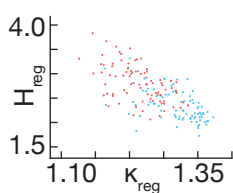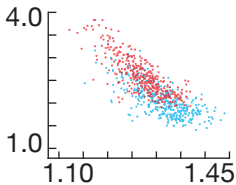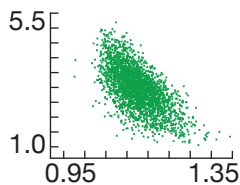

**d**

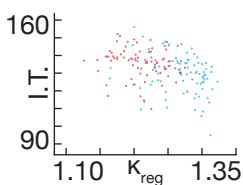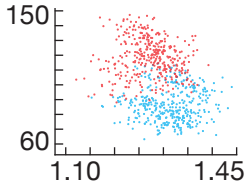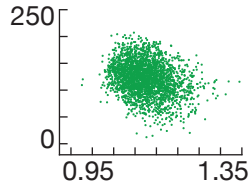

**Supplementary Figure 7: (a)** Information transmission (bits), as a function of regional entropy  $H_{\text{reg}}$  (bits). Colour coding and mice as in **Supp. Fig. 1 (a)**. **(b)**  $K_{\text{reg}}$  as a function of time (minutes). Colour coding and mice as **Supp. Fig. 1 (a)**. **(c)** Regional entropy  $H_{\text{reg}}$  (bits) as a function of  $K_{\text{reg}}$ . Colour coding and mice as in **Supp. Fig. 1 (a)**. **(d)** Information transmission (bits), as a function of  $K_{\text{reg}}$ . Colour coding and mice as in **Supp. Fig. 1 (a)**.
